# Supplementary material
Source: publisher figshare collection journal article supplement (https://tandf.figshare.com/ndownloader/files/22429965)
Supplement: Supplementary file 1 [file 22429965]

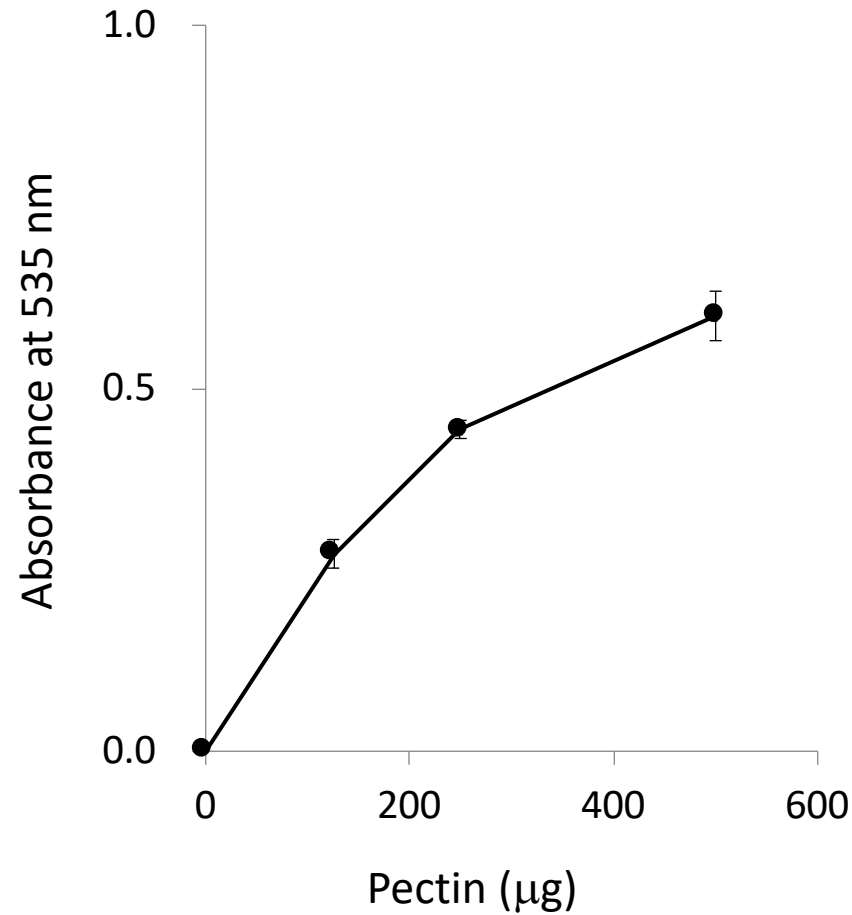

Supplemental figure 1. Standard graph of pectin quantification using the rapid quantification method with Nile red precipitation. A standard graph made using varied amount of citrus pectin is shown.
